# Supplementary material for: The gene repressor complex NuRD interacts with the histone variant H3.3 at promoters of active genes
Source: HighWire-hosted journal article supplement (doi:10.1101/gr.236224.118), 2018-09-25
Supplement: Supplemental_Figure_S1.pdf [file Supplemental_Figure_S1.pdf]

Supplemental Figure S1

A

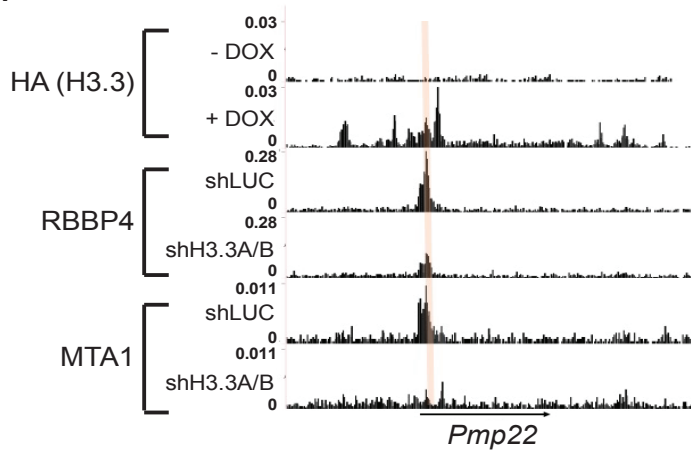

B

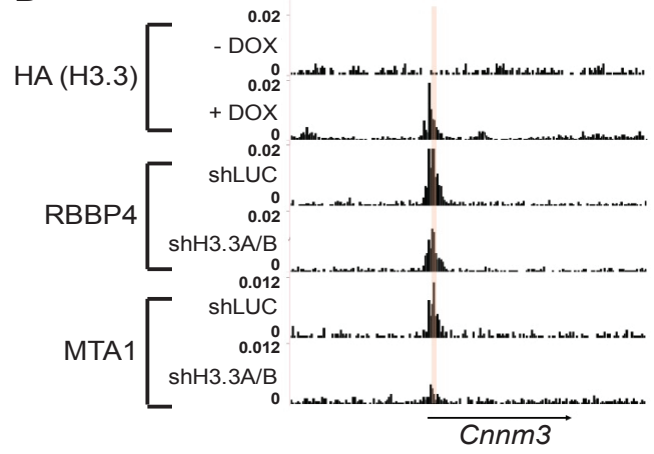

C

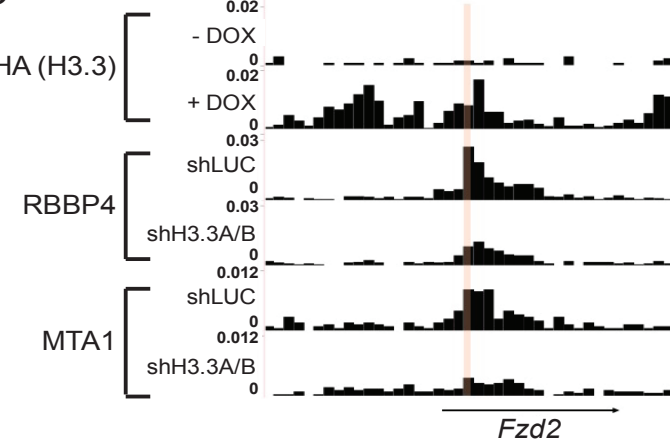

D

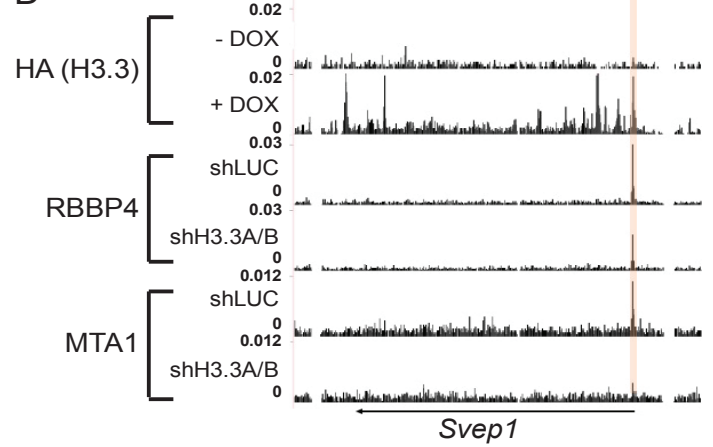

E

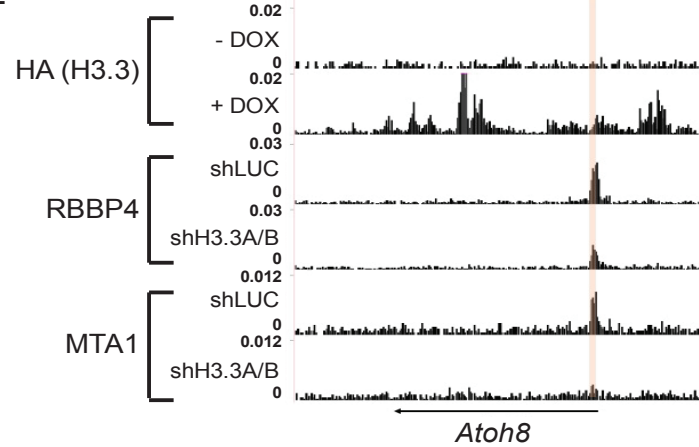

F

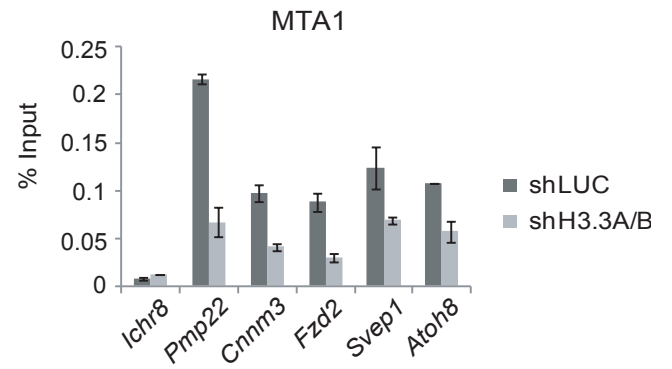

G

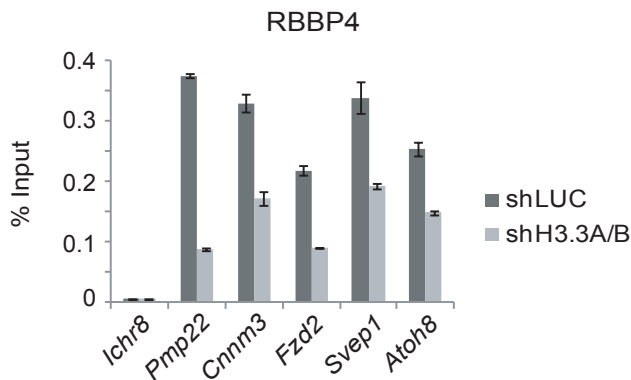

H

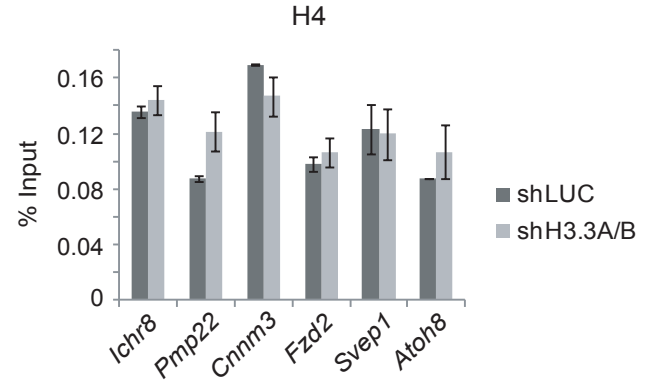

**Supplemental Figure S1. ChIP-qPCR validation of changes in RBBP4 and MTA1 following knockdown of H3.3.**

**A.** Genome browser representation of HA-ChIP-seq reads before and after doxycycline treatment from TETi-HA/FLAG-H3.3 MEF cells as well as reads for RBBP4/MTA1 before and after H3.3 knockdown at the *Pmp22* promoter. **B.** Genome browser representation of HA-ChIP-seq reads before and after doxycycline treatment from TETi-HA/FLAG-H3.3 MEF cells as well as reads for RBBP4/MTA1 before and after H3.3 knockdown at the *Cnnm3* promoter. **C.** Genome browser representation of HA-ChIP-seq reads before and after doxycycline treatment from TETi-HA/FLAG-H3.3 MEF cells as well as reads for RBBP4/MTA1 before and after H3.3 knockdown at the *Fzd2* promoter. **D.** Genome browser representation of HA-ChIP-seq reads before and after doxycycline treatment from TETi-HA/FLAG-H3.3 MEF cells as well as reads for RBBP4/MTA1 before and after H3.3 knockdown at the *Svep1* promoter. **E.** Genome browser representation of HA-ChIP-seq reads before and after doxycycline treatment from TETi-HA/FLAG-H3.3 MEF cells as well as reads for RBBP4/MTA1 before and after H3.3 knockdown at the *Atoh8* promoter. **F.** ChIP-qPCR validation of MTA1 enrichment following H3.3 knockdown at select gene promoters. Each qPCR reaction was performed in triplicate and enrichment was normalized to input. Values are presented as means, +/- standard error. **G.** ChIP-qPCR validation of RBBP4 enrichment following H3.3 knockdown at select gene promoters. Each qPCR reaction was performed in triplicate and enrichment was normalized to input. Values are presented as means, +/- standard deviation. **H.** ChIP-qPCR validation of H4 (HISTONE 4) enrichment following H3.3 knockdown at select gene promoters. Each qPCR reaction was performed in triplicate and enrichment was normalized to input. Values are presented as means, +/- standard deviation.
