# Supplementary material for: The gene repressor complex NuRD interacts with the histone variant H3.3 at promoters of active genes
Source: HighWire-hosted journal article supplement (doi:10.1101/gr.236224.118), 2018-09-25
Supplement: Supplemental_Table_S1.xlsx [file Supplemental_Table_S1.xlsx]

## Sheet: Raw spectral counts
Supplemental Table S1. Spectral counts for proteins that interact with H3.3 and H3.3 mutants. Proteins that interact with H3.3 and H3.3 mutants (lysine to arginine conversions at amino acid positions 4, 9, 27 and 36) were identified using an immunoprecipitation (IP)/mass spectrometry approach and protein abundance was measured using spectral counts.
Protein	Accession Number	HA/FLAG-H3.3WT - DOX (1)	HA/FLAG-H3.3WT - DOX (2)	HA/FLAG-H3.3WT + DOX (1)	HA/FLAG-H3.3WT + DOX (2)	HA/FLAG-H3.3K4R + DOX (1)	HA/FLAG-H3.3K4R + DOX (2)	HA/FLAG-H3.3K9R + DOX (1)	HA/FLAG-H3.3K9R + DOX (2)	HA/FLAG-H3.3K27R + DOX (1)	HA/FLAG-H3.3K27R + DOX (2)	HA/FLAG-H3.3K36R + DOX (1)	HA/FLAG-H3.3K36R + DOX (2)
Actin-like protein 6A	ACL6A_MOUSE	0	0	2	3	0	0	0	0	0	0	0	0
Anaphase-promoting complex subunit 16	APC16_MOUSE	0	0	2	0	0	0	0	1	1	0	0	1
Anaphase-promoting complex subunit 7	APC7_MOUSE	0	0	2	0	0	0	0	0	0	0	0	1
Aspartyl/asparaginyl beta-hydroxylase OS=Mus musculus GN=Asph PE=2 SV=1	ASPH_MOUSE	0	0	0	3	1	0	0	0	0	1	1	0
Transcriptional regulator ATRX	ATRX_MOUSE	0	0	13	10	2	2	3	7	10	8	12	11
Barrier-to-autointegration factor	BAF_MOUSE	0	0	3	5	6	3	6	3	2	4	5	2
Tyrosine-protein kinase BAZ1B	BAZ1B_MOUSE	0	0	2	5	0	1	3	8	2	5	8	0
Bromodomain-containing protein 2	BRD2_MOUSE	0	0	2	6	0	0	0	1	3	9	3	5
Chromobox protein homolog 1	CBX1_MOUSE	0	0	11	5	2	2	1	1	11	5	4	10
Chromobox protein homolog 3	CBX3_MOUSE	0	0	8	5	5	3	1	3	11	5	4	9
Chromobox protein homolog 5	CBX5_MOUSE	0	1	8	7	2	2	1	3	7	9	7	9
Chromobox protein homolog 8	CBX8_MOUSE	0	0	2	2	0	0	1	3	1	0	1	3
Coiled-coil domain-containing protein 86	CCD86_MOUSE	0	0	1	1	0	0	0	1	1	2	2	1
UPF0461 protein C5orf24 homolog	CE024_MOUSE	0	0	2	1	0	1	2	2	0	1	0	1
Centrin-2	CETN2_MOUSE	0	0	1	3	0	1	1	2	0	0	3	0
Chromodomain-helicase-DNA-binding protein 4	CHD4_MOUSE	0	3	13	13	3	0	3	6	8	10	13	8
Ubiquinone biosynthesis monooxygenase COQ6	COQ6_MOUSE	0	0	0	5	8	5	6	5	1	6	7	8
CTD small phosphatase-like protein 2	CTSL2_MOUSE	0	0	1	1	0	1	1	2	1	1	2	0
DNA damage-binding protein 1	DDB1_MOUSE	0	0	1	1	1	1	0	2	5	1	0	3
Protein DEK	DEK_MOUSE	0	0	5	7	0	0	2	3	10	6	8	9
Desmin	DESM_MOUSE	0	0	14	0	0	0	0	0	0	10	0	0
DnaJ homolog subfamily C member 9	DNJC9_MOUSE	0	0	12	6	7	4	8	7	6	6	4	6
DNA (cytosine-5)-methyltransferase 3A	DNM3A_MOUSE	0	0	1	2	0	0	0	3	1	2	1	1
Trifunctional enzyme subunit beta, mitochondrial	ECHB_MOUSE	0	0	2	4	0	0	0	0	1	3	2	1
Histone-lysine N-methyltransferase EHMT1	EHMT1_MOUSE	0	0	1	1	0	0	0	0	2	1	0	1
Protein ELYS	ELYS_MOUSE	0	0	1	0	0	0	0	2	3	0	3	1
Histone-lysine N-methyltransferase EZH2	EZH2_MOUSE	0	0	1	3	0	0	3	8	3	3	3	1
F-box only protein 28	FBX28_MOUSE	0	0	1	2	0	1	2	2	2	3	2	2
Histone H1.0	H10_MOUSE	0	3	17	7	5	3	9	8	26	8	10	25
Histone H1.1	H11_MOUSE	2	3	19	9	14	13	14	16	18	9	11	16
Histone H1.2	H12_MOUSE	5	11	43	20	19	33	30	30	43	23	29	41
Histone H1.3	H13_MOUSE	5	11	45	20	20	32	30	29	45	23	29	42
Histone H1.4	H14_MOUSE	4	10	42	22	22	32	30	30	42	23	30	39
Histone H1.5	H15_MOUSE	1	6	22	18	15	22	17	22	22	20	19	20
Histone H1t OS=Mus musculus GN=Hist1h1t PE=1 SV=4	H1T_MOUSE	0	0	20	12	9	20	14	15	20	14	20	19
Histone H2A type 1-K OS=Mus musculus GN=Hist1h2ak PE=1 SV=3	H2A1K_MOUSE	13	19	236	234	240	229	290	252	217	242	238	233
Histone H2A type 2-A	H2A2A_MOUSE (+1)	10	19	205	228	225	229	283	247	196	244	237	201
Histone H2A type 2-B	H2A2B_MOUSE	4	0	116	99	130	103	152	104	105	102	99	109
Histone H2A.J OS=Mus musculus GN=H2afj PE=2 SV=1	H2AJ_MOUSE	13	19	236	234	240	230	290	252	217	242	238	233
Core histone macro-H2A.2	H2AW_MOUSE	0	0	50	33	21	27	34	31	44	32	33	51
Histone H2A.x	H2AX_MOUSE	9	7	140	176	196	174	237	181	118	192	169	129
Core histone macro-H2A.1	H2AY_MOUSE	0	0	34	28	17	18	33	26	31	30	27	36
Histone H2A.Z	H2AZ_MOUSE	4	6	105	136	120	131	196	134	96	155	125	101
Histone H2B type 1-A	H2B1A_MOUSE	0	7	86	0	63	72	83	73	85	66	77	106
Histone H2B type 1-B OS=Mus musculus GN=Hist1h2bb PE=1 SV=3	H2B1B_MOUSE	13	25	304	240	230	281	311	307	331	255	279	347
Histone H2B type 1-C/E/G	H2B1C_MOUSE (+1)	13	25	305	241	231	281	312	307	333	255	278	347
Histone H2B type 1-P	H2B1P_MOUSE	13	25	306	240	230	280	311	306	333	254	279	349
Histone H2B type 2-B OS=Mus musculus GN=Hist2h2bb PE=1 SV=3	H2B2B_MOUSE	13	25	304	241	231	281	312	307	331	256	278	347
Histone H2B type 2-E	H2B2E_MOUSE	0	19	223	191	205	210	263	219	244	201	210	257
Histone H3.1	H31_MOUSE	6	9	142	125	68	116	85	137	141	117	130	143
Histone H3.2	H32_MOUSE	8	9	146	148	107	137	133	162	142	136	151	144
Histone H3.3	H33_MOUSE (+1)	10	10	186	169	119	151	156	181	172	162	173	188
Histone H4	H4_MOUSE	15	23	461	449	345	449	480	464	482	444	465	461
Histone deacetylase 1	HDAC1_MOUSE	0	3	17	11	2	0	2	10	15	10	9	17
Histone deacetylase 2	HDAC2_MOUSE	0	1	10	4	1	0	1	3	11	4	6	12
Hepatoma-derived growth factor-related protein 2	HDGR2_MOUSE	0	0	2	5	2	3	5	3	3	6	3	2
Hepatoma-derived growth factor-related protein 3	HDGR3_MOUSE	0	0	0	7	0	8	9	6	1	11	3	0
HIRA-interacting protein 3	HIRP3_MOUSE	0	0	0	1	0	2	0	1	0	1	2	0
High mobility group protein 20A	HM20A_MOUSE	0	0	1	2	0	0	0	1	1	1	2	1
High mobility group protein HMG-I/HMG-Y	HMGA1_MOUSE	0	0	28	12	21	23	32	22	26	13	20	30
High mobility group protein HMGI-C	HMGA2_MOUSE	1	1	67	26	18	30	30	31	64	28	34	65
Non-histone chromosomal protein HMG-14	HMGN1_MOUSE	0	0	22	15	18	18	18	24	24	20	20	25
Non-histone chromosomal protein HMG-17	HMGN2_MOUSE	0	0	26	15	15	11	23	15	22	18	16	28
High mobility group nucleosome-binding domain-containing protein 3	HMGN3_MOUSE	0	0	3	4	2	5	7	6	4	5	3	5
Heterochromatin protein 1-binding protein 3	HP1B3_MOUSE	0	0	17	24	1	17	29	28	16	27	25	21
Interferon-activable protein 202	IFI2_MOUSE	0	0	19	9	6	2	7	9	14	11	11	12
Keratin, type II cytoskeletal 75	K2C75_MOUSE	0	0	3	0	2	0	0	0	3	0	0	2
Histone acetyltransferase KAT7	KAT7_MOUSE	0	0	2	2	0	0	1	0	2	3	0	1
Voltage-gated potassium channel subunit beta-2	KCAB2_MOUSE	0	1	0	0	2	3	0	0	0	0	0	0
Microtubule-actin cross-linking factor 1	MACF1_MOUSE	0	1	0	0	0	0	0	0	0	0	1	0
Methyl-CpG-binding domain protein 2	MBD2_MOUSE	0	0	2	2	0	0	0	0	1	0	0	2
Methyl-CpG-binding protein 2	MECP2_MOUSE	0	0	2	3	0	2	1	2	1	2	1	0
Metastasis-associated protein MTA1	MTA1_MOUSE	0	0	18	16	1	0	3	3	19	15	9	24
Metastasis-associated protein MTA2	MTA2_MOUSE	0	0	15	10	1	0	2	3	16	7	5	12
Metastasis-associated protein MTA3	MTA3_MOUSE	0	0	9	4	0	0	0	2	10	3	2	10
N-acylneuraminate cytidylyltransferase	NEUA_MOUSE	0	0	4	5	0	1	1	4	2	7	7	2
Neurofilament light polypeptide OS=Mus musculus GN=Nefl PE=1 SV=5	NFL_MOUSE	0	0	0	2	0	0	0	0	0	3	0	0
Histone-lysine N-methyltransferase NSD3	NSD3_MOUSE	0	0	3	3	0	1	0	1	2	2	2	2
Nuclear ubiquitous casein and cyclin-dependent kinases substrate	NUCKS_MOUSE	0	0	4	6	1	1	1	2	3	8	5	3
Phosphatidylinositol 4-phosphate 3-kinase C2 domain-containing subunit gamma	P3C2G_MOUSE	0	0	5	5	0	4	0	4	4	3	3	6
Pyrroline-5-carboxylate reductase 2 OS=Mus musculus GN=Pycr2 PE=2 SV=1	P5CR2_MOUSE	0	1	0	1	1	1	0	1	0	1	1	0
Transcriptional repressor p66-beta	P66B_MOUSE	0	0	5	5	1	0	3	4	4	8	4	6
Poly [ADP-ribose] polymerase 1	PARP1_MOUSE	0	1	41	31	25	29	29	32	51	35	27	46
PHD finger protein 14	PHF14_MOUSE	0	0	2	2	1	0	1	2	3	3	2	2
Paired mesoderm homeobox protein 1	PRRX1_MOUSE (+1)	0	0	1	2	0	2	1	2	0	2	2	1
PC4 and SFRS1-interacting protein	PSIP1_MOUSE	0	1	35	37	8	33	36	38	35	39	27	25
Pleiotrophin	PTN_MOUSE	0	0	1	3	0	2	6	4	0	3	2	0
GTP-binding nuclear protein Ran	RAN_MOUSE	0	0	10	6	3	7	7	7	12	7	7	11
Histone-binding protein RBBP4	RBBP4_MOUSE	2	3	12	13	2	3	6	7	13	10	10	16
Regulator of chromosome condensation	RCC1_MOUSE	0	0	27	16	14	15	20	17	23	19	19	26
E3 ubiquitin-protein ligase RING1 OS=Mus musculus GN=Ring1 PE=1 SV=2	RING1_MOUSE	0	0	3	0	0	0	0	3	0	0	2	0
E3 ubiquitin-protein ligase RING2	RING2_MOUSE	0	1	6	4	2	2	3	5	1	3	2	2
40S ribosomal protein S30	RS30_MOUSE	0	0	1	0	0	1	0	1	1	1	1	1
S-phase kinase-associated protein 1	SKP1_MOUSE	0	0	0	1	0	0	2	2	1	1	1	0
Structural maintenance of chromosomes protein 3	SMC3_MOUSE	0	1	2	1	1	0	1	2	1	1	2	1
Transcription activator BRG1	SMCA4_MOUSE	0	0	2	2	0	0	1	1	2	3	3	2
SWI/SNF-related matrix-associated actin-dependent regulator of chromatin subfamily A member 5	SMCA5_MOUSE	0	0	3	3	0	0	0	9	6	6	8	2
FACT complex subunit SPT16	SP16H_MOUSE	0	2	7	18	25	9	15	17	5	17	12	9
Spindlin-1	SPIN1_MOUSE	0	1	1	1	0	0	1	0	1	3	0	0
FACT complex subunit SSRP1	SSRP1_MOUSE	0	0	5	9	11	9	6	10	6	10	11	7
Recombining binding protein suppressor of hairless	SUH_MOUSE	0	0	0	3	0	2	0	4	0	3	3	1
Transcription factor 20	TCF20_MOUSE	0	0	2	3	0	0	0	3	1	3	0	0
Activated RNA polymerase II transcriptional coactivator p15	TCP4_MOUSE	0	0	4	6	3	7	5	5	4	7	7	7
Transitional endoplasmic reticulum ATPase	TERA_MOUSE	0	0	22	22	0	3	10	11	20	16	23	10
Transcription factor A, mitochondrial	TFAM_MOUSE	0	0	1	2	0	2	1	1	3	1	1	1
DNA topoisomerase 1	TOP1_MOUSE	0	1	5	9	4	8	9	10	4	8	8	3
DNA topoisomerase 2-alpha	TOP2A_MOUSE	0	0	1	0	0	0	0	1	1	0	0	1
DNA topoisomerase 2-beta	TOP2B_MOUSE	0	0	5	5	2	0	2	5	3	4	2	5
Tumor suppressor p53-binding protein 1	TP53B_MOUSE	0	0	1	2	0	1	0	1	2	1	1	1
Targeting protein for Xklp2	TPX2_MOUSE	0	0	1	0	0	1	0	2	0	1	1	1
DNA repair protein complementing XP-C cells homolog	XPC_MOUSE	0	0	2	2	0	0	0	3	2	2	2	1
DNA repair protein XRCC1	XRCC1_MOUSE	0	0	1	1	1	1	1	2	2	1	0	2
Zinc finger CCCH domain-containing protein 11A	ZC11A_MOUSE	0	0	0	1	1	1	0	0	0	0	1	0
Zinc finger protein 512	ZN512_MOUSE	0	0	1	7	1	7	13	17	3	9	4	1

## Sheet: Normalized spec counts
Protein	Accession Number	HA/FLAG-H3.3WT + DOX (1)	HA/FLAG-H3.3WT + DOX (2)	HA/FLAG-H3.3K4R + DOX (1)	HA/FLAG-H3.3K4R + DOX (2)	HA/FLAG-H3.3K9R + DOX (1)	HA/FLAG-H3.3K9R + DOX (2)	HA/FLAG-H3.3K27R + DOX (1)	HA/FLAG-H3.3K27R + DOX (2)	HA/FLAG-H3.3K36R + DOX (1)	HA/FLAG-H3.3K36R + DOX (2)
Actin-like protein 6A	ACL6A_MOUSE	1.9478	3	0	0	0	0	0	0	0	0
Anaphase-promoting complex subunit 16	APC16_MOUSE	1.9478	0	0	0	0	0.9676	0.9315	0	0	0.9739
Anaphase-promoting complex subunit 7	APC7_MOUSE	1.9478	0	0	0	0	0	0	0	0	0.9739
Aspartyl/asparaginyl beta-hydroxylase OS=Mus musculus GN=Asph PE=2 SV=1	ASPH_MOUSE	0	3	1.30144	0	0	0	0	1.0112	0.9655	0
Transcriptional regulator ATRX	ATRX_MOUSE	12.6607	10	2.60288	2	2.8062	6.7732	9.315	8.0896	11.586	10.7129
Barrier-to-autointegration factor	BAF_MOUSE	2.9217	5	7.80864	3	5.6124	2.9028	1.863	4.0448	4.8275	1.9478
Tyrosine-protein kinase BAZ1B	BAZ1B_MOUSE	1.9478	5	0	1	2.8062	7.7408	1.863	5.056	7.724	0
Bromodomain-containing protein 2	BRD2_MOUSE	1.9478	6	0	0	0	0.9676	2.7945	9.1008	2.8965	4.8695
Chromobox protein homolog 1	CBX1_MOUSE	10.7129	5	2.60288	2	0.9354	0.9676	10.2465	5.056	3.862	9.739
Chromobox protein homolog 3	CBX3_MOUSE	7.7912	5	6.5072	3	0.9354	2.9028	10.2465	5.056	3.862	8.7651
Chromobox protein homolog 5	CBX5_MOUSE	7.7912	7	2.60288	2	0.9354	2.9028	6.5205	9.1008	6.7585	8.7651
Chromobox protein homolog 8	CBX8_MOUSE	1.9478	2	0	0	0.9354	2.9028	0.9315	0	0.9655	2.9217
Coiled-coil domain-containing protein 86	CCD86_MOUSE	0.9739	1	0	0	0	0.9676	0.9315	2.0224	1.931	0.9739
UPF0461 protein C5orf24 homolog	CE024_MOUSE	1.9478	1	0	1	1.8708	1.9352	0	1.0112	0	0.9739
Centrin-2	CETN2_MOUSE	0.9739	3	0	1	0.9354	1.9352	0	0	2.8965	0
Chromodomain-helicase-DNA-binding protein 4	CHD4_MOUSE	12.6607	13	3.90432	0	2.8062	5.8056	7.452	10.112	12.5515	7.7912
Ubiquinone biosynthesis monooxygenase COQ6	COQ6_MOUSE	0	5	10.4115	5	5.6124	4.838	0.9315	6.0672	6.7585	7.7912
CTD small phosphatase-like protein 2	CTSL2_MOUSE	0.9739	1	0	1	0.9354	1.9352	0.9315	1.0112	1.931	0
DNA damage-binding protein 1	DDB1_MOUSE	0.9739	1	1.30144	1	0	1.9352	4.6575	1.0112	0	2.9217
Protein DEK	DEK_MOUSE	4.8695	7	0	0	1.8708	2.9028	9.315	6.0672	7.724	8.7651
Desmin	DESM_MOUSE	13.6346	0	0	0	0	0	0	10.112	0	0
DnaJ homolog subfamily C member 9	DNJC9_MOUSE	11.6868	6	9.11008	4	7.4832	6.7732	5.589	6.0672	3.862	5.8434
DNA (cytosine-5)-methyltransferase 3A	DNM3A_MOUSE	0.9739	2	0	0	0	2.9028	0.9315	2.0224	0.9655	0.9739
Trifunctional enzyme subunit beta, mitochondrial	ECHB_MOUSE	1.9478	4	0	0	0	0	0.9315	3.0336	1.931	0.9739
Histone-lysine N-methyltransferase EHMT1	EHMT1_MOUSE	0.9739	1	0	0	0	0	1.863	1.0112	0	0.9739
Protein ELYS	ELYS_MOUSE	0.9739	0	0	0	0	1.9352	2.7945	0	2.8965	0.9739
Histone-lysine N-methyltransferase EZH2	EZH2_MOUSE	0.9739	3	0	0	2.8062	7.7408	2.7945	3.0336	2.8965	0.9739
F-box only protein 28	FBX28_MOUSE	0.9739	2	0	1	1.8708	1.9352	1.863	3.0336	1.931	1.9478
Histone H1.0	H10_MOUSE	16.5563	7	6.5072	3	8.4186	7.7408	24.219	8.0896	9.655	24.3475
Histone H1.1	H11_MOUSE	18.5041	9	18.2202	13	13.0956	15.4816	16.767	9.1008	10.6205	15.5824
Histone H1.2	H12_MOUSE	41.8777	20	24.7274	33	28.062	29.028	40.0545	23.2576	27.9995	39.9299
Histone H1.3	H13_MOUSE	43.8255	20	26.0288	32	28.062	28.0604	41.9175	23.2576	27.9995	40.9038
Histone H1.4	H14_MOUSE	40.9038	22	28.6317	32	28.062	29.028	39.123	23.2576	28.965	37.9821
Histone H1.5	H15_MOUSE	21.4258	18	19.5216	22	15.9018	21.2872	20.493	20.224	18.3445	19.478
Histone H1t OS=Mus musculus GN=Hist1h1t PE=1 SV=4	H1T_MOUSE	19.478	12	11.713	20	13.0956	14.514	18.63	14.1568	19.31	18.5041
Histone H2A type 1-K OS=Mus musculus GN=Hist1h2ak PE=1 SV=3	H2A1K_MOUSE	229.84	234	312.346	229	271.266	243.835	202.136	244.71	229.789	226.919
Histone H2A type 2-A	H2A2A_MOUSE (+1)	199.649	228	292.824	229	264.718	238.997	182.574	246.733	228.823	195.754
Histone H2A type 2-B	H2A2B_MOUSE	112.972	99	169.187	103	142.181	100.63	97.8075	103.142	95.5845	106.155
Histone H2A.J OS=Mus musculus GN=H2afj PE=2 SV=1	H2AJ_MOUSE	229.84	234	312.346	230	271.266	243.835	202.136	244.71	229.789	226.919
Core histone macro-H2A.2	H2AW_MOUSE	48.695	33	27.3302	27	31.8036	29.9956	40.986	32.3584	31.8615	49.6689
Histone H2A.x	H2AX_MOUSE	136.346	176	255.082	174	221.69	175.136	109.917	194.15	163.169	125.633
Core histone macro-H2A.1	H2AY_MOUSE	33.1126	28	22.1245	18	30.8682	25.1576	28.8765	30.336	26.0685	35.0604
Histone H2A.Z	H2AZ_MOUSE	102.26	136	156.173	131	183.338	129.658	89.424	156.736	120.688	98.3639
Histone H2B type 1-A	H2B1A_MOUSE	83.7554	0	81.9907	72	77.6382	70.6348	79.1775	66.7392	74.3435	103.233
Histone H2B type 1-B OS=Mus musculus GN=Hist1h2bb PE=1 SV=3	H2B1B_MOUSE	296.066	240	299.331	281	290.909	297.053	308.327	257.856	269.375	337.943
Histone H2B type 1-C/E/G	H2B1C_MOUSE (+1)	297.039	241	300.633	281	291.845	297.053	310.19	257.856	268.409	337.943
Histone H2B type 1-P	H2B1P_MOUSE	298.013	240	299.331	280	290.909	296.086	310.19	256.845	269.375	339.891
Histone H2B type 2-B OS=Mus musculus GN=Hist2h2bb PE=1 SV=3	H2B2B_MOUSE	296.066	241	300.633	281	291.845	297.053	308.327	258.867	268.409	337.943
Histone H2B type 2-E	H2B2E_MOUSE	217.18	191	266.795	210	246.01	211.904	227.286	203.251	202.755	250.292
Histone H3.1	H31_MOUSE	138.294	125	88.4979	116	79.509	132.561	131.341	118.31	125.515	139.268
Histone H3.2	H32_MOUSE	142.189	148	139.254	137	124.408	156.751	132.273	137.523	145.791	140.242
Histone H3.3	H33_MOUSE (+1)	181.145	169	154.871	151	145.922	175.136	160.218	163.814	167.031	183.093
Histone H4	H4_MOUSE	448.968	449	448.997	449	448.992	448.966	448.983	448.973	448.958	448.968
Histone deacetylase 1	HDAC1_MOUSE	16.5563	11	2.60288	0	1.8708	9.676	13.9725	10.112	8.6895	16.5563
Histone deacetylase 2	HDAC2_MOUSE	9.739	4	1.30144	0	0.9354	2.9028	10.2465	4.0448	5.793	11.6868
Hepatoma-derived growth factor-related protein 2	HDGR2_MOUSE	1.9478	5	2.60288	3	4.677	2.9028	2.7945	6.0672	2.8965	1.9478
Hepatoma-derived growth factor-related protein 3	HDGR3_MOUSE	0	7	0	8	8.4186	5.8056	0.9315	11.1232	2.8965	0
HIRA-interacting protein 3	HIRP3_MOUSE	0	1	0	2	0	0.9676	0	1.0112	1.931	0
High mobility group protein 20A	HM20A_MOUSE	0.9739	2	0	0	0	0.9676	0.9315	1.0112	1.931	0.9739
High mobility group protein HMG-I/HMG-Y	HMGA1_MOUSE	27.2692	12	27.3302	23	29.9328	21.2872	24.219	13.1456	19.31	29.217
High mobility group protein HMGI-C	HMGA2_MOUSE	65.2513	26	23.4259	30	28.062	29.9956	59.616	28.3136	32.827	63.3035
Non-histone chromosomal protein HMG-14	HMGN1_MOUSE	21.4258	15	23.4259	18	16.8372	23.2224	22.356	20.224	19.31	24.3475
Non-histone chromosomal protein HMG-17	HMGN2_MOUSE	25.3214	15	19.5216	11	21.5142	14.514	20.493	18.2016	15.448	27.2692
High mobility group nucleosome-binding domain-containing protein 3	HMGN3_MOUSE	2.9217	4	2.60288	5	6.5478	5.8056	3.726	5.056	2.8965	4.8695
Heterochromatin protein 1-binding protein 3	HP1B3_MOUSE	16.5563	24	1.30144	17	27.1266	27.0928	14.904	27.3024	24.1375	20.4519
Interferon-activable protein 202	IFI2_MOUSE	18.5041	9	7.80864	2	6.5478	8.7084	13.041	11.1232	10.6205	11.6868
Keratin, type II cytoskeletal 75	K2C75_MOUSE	2.9217	0	2.60288	0	0	0	2.7945	0	0	1.9478
Histone acetyltransferase KAT7	KAT7_MOUSE	1.9478	2	0	0	0.9354	0	1.863	3.0336	0	0.9739
Voltage-gated potassium channel subunit beta-2	KCAB2_MOUSE	0	0	2.60288	3	0	0	0	0	0	0
Microtubule-actin cross-linking factor 1	MACF1_MOUSE	0	0	0	0	0	0	0	0	0.9655	0
Methyl-CpG-binding domain protein 2	MBD2_MOUSE	1.9478	2	0	0	0	0	0.9315	0	0	1.9478
Methyl-CpG-binding protein 2	MECP2_MOUSE	1.9478	3	0	2	0.9354	1.9352	0.9315	2.0224	0.9655	0
Metastasis-associated protein MTA1	MTA1_MOUSE	17.5302	16	1.30144	0	2.8062	2.9028	17.6985	15.168	8.6895	23.3736
Metastasis-associated protein MTA2	MTA2_MOUSE	14.6085	10	1.30144	0	1.8708	2.9028	14.904	7.0784	4.8275	11.6868
Metastasis-associated protein MTA3	MTA3_MOUSE	8.7651	4	0	0	0	1.9352	9.315	3.0336	1.931	9.739
N-acylneuraminate cytidylyltransferase	NEUA_MOUSE	3.8956	5	0	1	0.9354	3.8704	1.863	7.0784	6.7585	1.9478
Neurofilament light polypeptide OS=Mus musculus GN=Nefl PE=1 SV=5	NFL_MOUSE	0	2	0	0	0	0	0	3.0336	0	0
Histone-lysine N-methyltransferase NSD3	NSD3_MOUSE	2.9217	3	0	1	0	0.9676	1.863	2.0224	1.931	1.9478
Nuclear ubiquitous casein and cyclin-dependent kinases substrate	NUCKS_MOUSE	3.8956	6	1.30144	1	0.9354	1.9352	2.7945	8.0896	4.8275	2.9217
Phosphatidylinositol 4-phosphate 3-kinase C2 domain-containing subunit gamma	P3C2G_MOUSE	4.8695	5	0	4	0	3.8704	3.726	3.0336	2.8965	5.8434
Pyrroline-5-carboxylate reductase 2 OS=Mus musculus GN=Pycr2 PE=2 SV=1	P5CR2_MOUSE	0	1	1.30144	1	0	0.9676	0	1.0112	0.9655	0
Transcriptional repressor p66-beta	P66B_MOUSE	4.8695	5	1.30144	0	2.8062	3.8704	3.726	8.0896	3.862	5.8434
Poly [ADP-ribose] polymerase 1	PARP1_MOUSE	39.9299	31	32.536	29	27.1266	30.9632	47.5065	35.392	26.0685	44.7994
PHD finger protein 14	PHF14_MOUSE	1.9478	2	1.30144	0	0.9354	1.9352	2.7945	3.0336	1.931	1.9478
Paired mesoderm homeobox protein 1	PRRX1_MOUSE (+1)	0.9739	2	0	2	0.9354	1.9352	0	2.0224	1.931	0.9739
PC4 and SFRS1-interacting protein	PSIP1_MOUSE	34.0865	37	10.4115	33	33.6744	36.7688	32.6025	39.4368	26.0685	24.3475
Pleiotrophin	PTN_MOUSE	0.9739	3	0	2	5.6124	3.8704	0	3.0336	1.931	0
GTP-binding nuclear protein Ran	RAN_MOUSE	9.739	6	3.90432	7	6.5478	6.7732	11.178	7.0784	6.7585	10.7129
Histone-binding protein RBBP4	RBBP4_MOUSE	11.6868	13	2.60288	3	5.6124	6.7732	12.1095	10.112	9.655	15.5824
Regulator of chromosome condensation	RCC1_MOUSE	26.2953	16	18.2202	15	18.708	16.4492	21.4245	19.2128	18.3445	25.3214
E3 ubiquitin-protein ligase RING1 OS=Mus musculus GN=Ring1 PE=1 SV=2	RING1_MOUSE	2.9217	0	0	0	0	2.9028	0	0	1.931	0
E3 ubiquitin-protein ligase RING2	RING2_MOUSE	5.8434	4	2.60288	2	2.8062	4.838	0.9315	3.0336	1.931	1.9478
40S ribosomal protein S30	RS30_MOUSE	0.9739	0	0	1	0	0.9676	0.9315	1.0112	0.9655	0.9739
S-phase kinase-associated protein 1	SKP1_MOUSE	0	1	0	0	1.8708	1.9352	0.9315	1.0112	0.9655	0
Structural maintenance of chromosomes protein 3	SMC3_MOUSE	1.9478	1	1.30144	0	0.9354	1.9352	0.9315	1.0112	1.931	0.9739
Transcription activator BRG1	SMCA4_MOUSE	1.9478	2	0	0	0.9354	0.9676	1.863	3.0336	2.8965	1.9478
SWI/SNF-related matrix-associated actin-dependent regulator of chromatin subfamily A member 5	SMCA5_MOUSE	2.9217	3	0	0	0	8.7084	5.589	6.0672	7.724	1.9478
FACT complex subunit SPT16	SP16H_MOUSE	6.8173	18	32.536	9	14.031	16.4492	4.6575	17.1904	11.586	8.7651
Spindlin-1	SPIN1_MOUSE	0.9739	1	0	0	0.9354	0	0.9315	3.0336	0	0
FACT complex subunit SSRP1	SSRP1_MOUSE	4.8695	9	14.3158	9	5.6124	9.676	5.589	10.112	10.6205	6.8173
Recombining binding protein suppressor of hairless	SUH_MOUSE	0	3	0	2	0	3.8704	0	3.0336	2.8965	0.9739
Transcription factor 20	TCF20_MOUSE	1.9478	3	0	0	0	2.9028	0.9315	3.0336	0	0
Activated RNA polymerase II transcriptional coactivator p15	TCP4_MOUSE	3.8956	6	3.90432	7	4.677	4.838	3.726	7.0784	6.7585	6.8173
Transitional endoplasmic reticulum ATPase	TERA_MOUSE	21.4258	22	0	3	9.354	10.6436	18.63	16.1792	22.2065	9.739
Transcription factor A, mitochondrial	TFAM_MOUSE	0.9739	2	0	2	0.9354	0.9676	2.7945	1.0112	0.9655	0.9739
DNA topoisomerase 1	TOP1_MOUSE	4.8695	9	5.20576	8	8.4186	9.676	3.726	8.0896	7.724	2.9217
DNA topoisomerase 2-alpha	TOP2A_MOUSE	0.9739	0	0	0	0	0.9676	0.9315	0	0	0.9739
DNA topoisomerase 2-beta	TOP2B_MOUSE	4.8695	5	2.60288	0	1.8708	4.838	2.7945	4.0448	1.931	4.8695
Tumor suppressor p53-binding protein 1	TP53B_MOUSE	0.9739	2	0	1	0	0.9676	1.863	1.0112	0.9655	0.9739
Targeting protein for Xklp2	TPX2_MOUSE	0.9739	0	0	1	0	1.9352	0	1.0112	0.9655	0.9739
DNA repair protein complementing XP-C cells homolog	XPC_MOUSE	1.9478	2	0	0	0	2.9028	1.863	2.0224	1.931	0.9739
DNA repair protein XRCC1	XRCC1_MOUSE	0.9739	1	1.30144	1	0.9354	1.9352	1.863	1.0112	0	1.9478
Zinc finger CCCH domain-containing protein 11A	ZC11A_MOUSE	0	1	1.30144	1	0	0	0	0	0.9655	0
Zinc finger protein 512	ZN512_MOUSE	0.9739	7	1.30144	7	12.1602	16.4492	2.7945	9.1008	3.862	0.9739

## Sheet: Differential K4R
HA/FLAG-H3.3 K4R_DOWNREGULATED	HA/FLAG-H3.3 K4R_UPREGULATED
ACL6A_MOUSE
KAT7_MOUSE
RING2_MOUSE
TCF20_MOUSE
MBD2_MOUSE
CBX8_MOUSE
TERA_MOUSE
MTA1_MOUSE
MTA2_MOUSE
CHD4_MOUSE
CBX1_MOUSE
MTA3_MOUSE
CBX5_MOUSE
DEK_MOUSE
NUCKS_MOUSE
NSD3_MOUSE
BRD2_MOUSE
ECHB_MOUSE
SMCA4_MOUSE
IFI2_MOUSE
H10_MOUSE
HDAC1_MOUSE
ATRX_MOUSE
RBBP4_MOUSE
HDAC2_MOUSE
P66B_MOUSE
NEUA_MOUSE
SMCA5_MOUSE
BAZ1B_MOUSE
XPC_MOUSE

## Sheet: Differential K9R
HA/FLAG-H3.3 K9R_DOWNREGULATED	HA/FLAG-H3.3 K9R_UPREGULATED
ACL6A_MOUSE	EZH2_MOUSE
KAT7_MOUSE	ZN512_MOUSE
MBD2_MOUSE
TERA_MOUSE
MTA1_MOUSE
MTA2_MOUSE
CHD4_MOUSE
CBX1_MOUSE
MTA3_MOUSE
CBX5_MOUSE
DEK_MOUSE
NUCKS_MOUSE
NSD3_MOUSE
BRD2_MOUSE
ECHB_MOUSE
SMCA4_MOUSE

## Sheet: Differential K27R
HA/FLAG-H3.3 K27R_DOWNREGULATED	HA/FLAG-H3.3 K27R_UPREGULATED
ACL6A_MOUSE
MBD2_MOUSE
CBX8_MOUSE

## Sheet: Differential K36R
HA/FLAG-H3.3 K36R_DOWNREGULATED	HA/FLAG-H3.3 K36R_UPREGULATED
ACL6A_MOUSE
KAT7_MOUSE
RING2_MOUSE
TCF20_MOUSE
MECP2_MOUSE
