# Supplementary material for: The gene repressor complex NuRD interacts with the histone variant H3.3 at promoters of active genes
Source: HighWire-hosted journal article supplement (doi:10.1101/gr.236224.118), 2018-09-25
Supplement: Supplemental_Table_S2.xlsx [file Supplemental_Table_S2.xlsx]

## Sheet: Raw Spectral Counts
Supplemental Table S2. Spectral counts for proteins that interact with H3.3 and H3.1. Proteins that interact with H3.3 and H3.1 were identified using an immunoprecipitation (IP)/mass spectrometry approach and protein abundance was measured using spectral counts.
MS/MS View:547 Proteins in 488 ClustersWith 4 Decoys	Accession Number	HA/FLAG-H3.1 - DOX	HA/FLAG-H3.3 - DOX	HA/FLAG-H3.1 + DOX (1)	HA/FLAG-H3.3 + DOX (1)	HA/FLAG-H3.1 + DOX (2)	HA/FLAG-H3.3 + DOX (2)
Histone H4 OS=Mus musculus GN=Hist1h4a PE=1 SV=2	H4_MOUSE	25	13	374	348	272	379
Cluster of Histone H2B type 2-B OS=Mus musculus GN=Hist2h2bb PE=1 SV=3 (H2B2B_MOUSE)	H2B2B_MOUSE [3]	25	9	201	196	175	221
Cluster of Histone H3.3 OS=Mus musculus GN=H3f3a PE=1 SV=2 (H33_MOUSE)	H33_MOUSE [4]	13	9	161	125	142	151
Histone H3.1 OS=Mus musculus GN=Hist1h3a PE=1 SV=2	H31_MOUSE	5	1	99	6	79	6
Cluster of Histone H2A type 1-F OS=Mus musculus GN=Hist1h2af PE=1 SV=3 (H2A1F_MOUSE)	H2A1F_MOUSE [8]	9	7	91	88	124	124
Poly [ADP-ribose] polymerase 1 OS=Mus musculus GN=Parp1 PE=1 SV=3	PARP1_MOUSE	0	0	40	29	31	27
Basement membrane-specific heparan sulfate proteoglycan core protein OS=Mus musculus GN=Hspg2 PE=1 SV=1	PGBM_MOUSE	6	9	32	38	39	43
Histone H3.2 OS=Mus musculus GN=Hist1h3b PE=1 SV=2	H32_MOUSE	4	2	29	30	31	32
Histone H2A.V OS=Mus musculus GN=H2afv PE=1 SV=3	H2AV_MOUSE (+1)	1	1	27	29	31	42
Histone H2A type 1-F OS=Mus musculus GN=Hist1h2af PE=1 SV=3	H2A1F_MOUSE (+5)	4	3	23	25	27	24
High mobility group protein HMG-I/HMG-Y OS=Mus musculus GN=Hmga1 PE=1 SV=4	HMGA1_MOUSE	1	0	22	13	19	21
Core histone macro-H2A.2 OS=Mus musculus GN=H2afy2 PE=1 SV=3	H2AW_MOUSE	0	0	22	31	22	35
Non-histone chromosomal protein HMG-14 OS=Mus musculus GN=Hmgn1 PE=1 SV=2	HMGN1_MOUSE	0	0	22	25	10	23
High mobility group protein HMGI-C OS=Mus musculus GN=Hmga2 PE=1 SV=1	HMGA2_MOUSE	1	1	21	19	23	23
Core histone macro-H2A.1 OS=Mus musculus GN=H2afy PE=1 SV=3	H2AY_MOUSE	0	0	19	18	15	28
PC4 and SFRS1-interacting protein OS=Mus musculus GN=Psip1 PE=1 SV=1	PSIP1_MOUSE	0	0	18	26	11	23
Cluster of Histone H1.4 OS=Mus musculus GN=Hist1h1e PE=1 SV=2 (H14_MOUSE)	H14_MOUSE [3]	3	3	16	16	12	17
Histone H2A type 2-A OS=Mus musculus GN=Hist2h2aa1 PE=1 SV=3	H2A2A_MOUSE (+1)	2	3	15	16	16	16
Histone H3.3 OS=Mus musculus GN=H3f3a PE=1 SV=2	H33_MOUSE (+1)	2	4	14	62	10	81
Interferon-activable protein 202 OS=Mus musculus GN=Ifi202 PE=1 SV=3	IFI2_MOUSE	0	0	14	12	7	10
Regulator of chromosome condensation OS=Mus musculus GN=Rcc1 PE=1 SV=1	RCC1_MOUSE	0	0	14	22	14	19
Histone H1.5 OS=Mus musculus GN=Hist1h1b PE=1 SV=2	H15_MOUSE	3	1	12	11	2	13
Non-histone chromosomal protein HMG-17 OS=Mus musculus GN=Hmgn2 PE=1 SV=2	HMGN2_MOUSE	0	0	12	13	0	14
FACT complex subunit SPT16 OS=Mus musculus GN=Supt16h PE=1 SV=2	SP16H_MOUSE	0	0	11	14	9	20
DnaJ homolog subfamily C member 9 OS=Mus musculus GN=Dnajc9 PE=2 SV=2	DNJC9_MOUSE	0	0	10	7	8	6
Transitional endoplasmic reticulum ATPase OS=Mus musculus GN=Vcp PE=1 SV=4	TERA_MOUSE	0	0	9	9	5	12
Cluster of Metastasis-associated protein MTA1 OS=Mus musculus GN=Mta1 PE=1 SV=1 (MTA1_MOUSE)	MTA1_MOUSE	0	0	8	4	3	4
Chromodomain-helicase-DNA-binding protein 4 OS=Mus musculus GN=Chd4 PE=1 SV=1	CHD4_MOUSE	0	0	7	3	1	4
Barrier-to-autointegration factor OS=Mus musculus GN=Banf1 PE=1 SV=1	BAF_MOUSE	0	0	7	6	7	6
Chromobox protein homolog 5 OS=Mus musculus GN=Cbx5 PE=1 SV=1	CBX5_MOUSE	0	0	7	8	11	9
Metastasis-associated protein MTA1 OS=Mus musculus GN=Mta1 PE=1 SV=1	MTA1_MOUSE	0	0	7	3	2	4
Histone H2AX OS=Mus musculus GN=H2afx PE=1 SV=2	H2AX_MOUSE	0	0	6	9	11	8
FACT complex subunit SSRP1 OS=Mus musculus GN=Ssrp1 PE=1 SV=2	SSRP1_MOUSE	0	0	6	8	10	6
Heterochromatin protein 1-binding protein 3 OS=Mus musculus GN=Hp1bp3 PE=1 SV=1	HP1B3_MOUSE	0	0	6	13	6	12
Histone deacetylase 1 OS=Mus musculus GN=Hdac1 PE=1 SV=1	HDAC1_MOUSE	0	0	6	3	2	6
Histone-binding protein RBBP4 OS=Mus musculus GN=Rbbp4 PE=1 SV=5	RBBP4_MOUSE	0	2	6	2	10	9
Histone H1.4 OS=Mus musculus GN=Hist1h1e PE=1 SV=2	H14_MOUSE	0	0	5	6	2	5
Activated RNA polymerase II transcriptional coactivator p15 OS=Mus musculus GN=Sub1 PE=1 SV=3	TCP4_MOUSE	0	0	5	5	2	6
DNA topoisomerase 1 OS=Mus musculus GN=Top1 PE=1 SV=2	TOP1_MOUSE	0	0	5	4	2	4
Transcriptional repressor p66-beta OS=Mus musculus GN=Gatad2b PE=1 SV=1	P66B_MOUSE	0	0	5	2	2	4
Glypican-4 OS=Mus musculus GN=Gpc4 PE=2 SV=2	GPC4_MOUSE	0	0	4	4	2	1
Histone H1.0 OS=Mus musculus GN=H1f0 PE=2 SV=4	H10_MOUSE	0	0	4	7	2	5
Metastasis-associated protein MTA2 OS=Mus musculus GN=Mta2 PE=1 SV=1	MTA2_MOUSE	0	0	4	4	2	3
60S ribosomal protein L30 OS=Mus musculus GN=Rpl30 PE=2 SV=2	RL30_MOUSE	0	0	3	2	1	0
Chromobox protein homolog 3 OS=Mus musculus GN=Cbx3 PE=1 SV=2	CBX3_MOUSE	0	0	3	2	3	3
GTP-binding nuclear protein Ran OS=Mus musculus GN=Ran PE=1 SV=3	RAN_MOUSE	0	0	3	6	4	6
High mobility group nucleosome-binding domain-containing protein 3 OS=Mus musculus GN=Hmgn3 PE=2 SV=1	HMGN3_MOUSE	0	0	3	6	0	3
Nucleolin OS=Mus musculus GN=Ncl PE=1 SV=2	NUCL_MOUSE	0	1	3	0	5	1
Transcriptional regulator ATRX OS=Mus musculus GN=Atrx PE=1 SV=3	ATRX_MOUSE	0	0	3	7	1	9
E3 ubiquitin-protein ligase RING2 OS=Mus musculus GN=Rnf2 PE=1 SV=1	RING2_MOUSE	0	0	2	3	2	3
Hepatoma-derived growth factor-related protein 2 OS=Mus musculus GN=Hdgfrp2 PE=1 SV=1	HDGR2_MOUSE	0	0	2	3	0	2
Histone-lysine N-methyltransferase EZH2 OS=Mus musculus GN=Ezh2 PE=1 SV=2	EZH2_MOUSE	0	0	2	4	3	4
Nuclear ubiquitous casein and cyclin-dependent kinase substrate 1 OS=Mus musculus GN=Nucks1 PE=1 SV=1	NUCKS_MOUSE	0	0	2	3	2	1
PHD finger protein 14 OS=Mus musculus GN=Phf14 PE=1 SV=1	PHF14_MOUSE	0	0	2	1	3	2
Protein DEK OS=Mus musculus GN=Dek PE=1 SV=1	DEK_MOUSE	0	0	2	3	2	3
Zinc finger CCCH domain-containing protein 11A OS=Mus musculus GN=Zc3h11a PE=2 SV=1	ZC11A_MOUSE	0	0	2	0	2	0
Zinc finger protein 512 OS=Mus musculus GN=Znf512 PE=2 SV=2	ZN512_MOUSE	0	0	2	2	0	9
CTD small phosphatase-like protein 2 OS=Mus musculus GN=Ctdspl2 PE=2 SV=1	CTSL2_MOUSE	0	0	1	0	1	1
Chromatin modification-related protein MEAF6 OS=Mus musculus GN=Meaf6 PE=2 SV=1	EAF6_MOUSE (+1)	0	0	1	0	0	1
Chromobox protein homolog 1 OS=Mus musculus GN=Cbx1 PE=1 SV=1	CBX1_MOUSE	0	0	1	3	5	2
DNA damage-binding protein 1 OS=Mus musculus GN=Ddb1 PE=1 SV=2	DDB1_MOUSE	0	0	1	3	2	1
DNA ligase 3 OS=Mus musculus GN=Lig3 PE=1 SV=2	DNLI3_MOUSE	0	0	1	0	0	1
DNA repair protein XRCC1 OS=Mus musculus GN=Xrcc1 PE=1 SV=2	XRCC1_MOUSE	0	0	1	1	0	1
DNA topoisomerase 2-beta OS=Mus musculus GN=Top2b PE=1 SV=2	TOP2B_MOUSE	0	0	1	2	3	2
Exportin-2 OS=Mus musculus GN=Cse1l PE=2 SV=1	XPO2_MOUSE	0	0	1	2	1	3
F-box only protein 28 OS=Mus musculus GN=Fbxo28 PE=2 SV=1	FBX28_MOUSE	0	0	1	1	0	3
Glypican-1 OS=Mus musculus GN=Gpc1 PE=1 SV=1	GPC1_MOUSE	0	0	1	0	1	0
High mobility group protein 20A OS=Mus musculus GN=Hmg20a PE=2 SV=1	HM20A_MOUSE	0	0	1	1	1	3
Histone acetyltransferase KAT7 OS=Mus musculus GN=Kat7 PE=2 SV=1	KAT7_MOUSE	0	0	1	1	0	1
Pleiotrophin OS=Mus musculus GN=Ptn PE=2 SV=1	PTN_MOUSE	0	0	1	4	2	4
Probable ATP-dependent RNA helicase DDX5 OS=Mus musculus GN=Ddx5 PE=1 SV=2	DDX5_MOUSE	0	0	1	0	1	0
S-phase kinase-associated protein 1 OS=Mus musculus GN=Skp1 PE=1 SV=3	SKP1_MOUSE	0	0	1	1	2	1
Structural maintenance of chromosomes protein 3 OS=Mus musculus GN=Smc3 PE=1 SV=2	SMC3_MOUSE	0	0	1	1	2	1
Targeting protein for Xklp2 OS=Mus musculus GN=Tpx2 PE=1 SV=1	TPX2_MOUSE	0	0	1	0	1	0
Transcription elongation factor, mitochondrial OS=Mus musculus GN=Tefm PE=2 SV=1	TEFM_MOUSE	0	0	1	0	1	1
Transcription factor 20 OS=Mus musculus GN=Tcf20 PE=1 SV=3	TCF20_MOUSE	0	0	1	0	1	1
Triple functional domain protein OS=Mus musculus GN=Trio PE=1 SV=3	TRIO_MOUSE	0	0	1	0	0	1
YY1-associated factor 2 OS=Mus musculus GN=Yaf2 PE=1 SV=1	YAF2_MOUSE (+1)	0	0	1	0	0	1
Histone deacetylase 2 OS=Mus musculus GN=Hdac2 PE=1 SV=1	HDAC2_MOUSE	0	0	0	1	1	4
Protein ELYS OS=Mus musculus GN=Ahctf1 PE=1 SV=1	ELYS_MOUSE	0	0	0	2	6	0
SWI/SNF-related matrix-associated actin-dependent regulator of chromatin subfamily A member 5 OS=Mus musculus GN=Smarca5 PE=1 SV=1	SMCA5_MOUSE	0	0	0	2	3	0
Chromobox protein homolog 8 OS=Mus musculus GN=Cbx8 PE=1 SV=1	CBX8_MOUSE	0	0	0	2	2	1
Cysteine and glycine-rich protein 2 OS=Mus musculus GN=Csrp2 PE=1 SV=3	CSRP2_MOUSE	0	1	0	1	1	1
Cytoplasmic dynein 1 heavy chain 1 OS=Mus musculus GN=Dync1h1 PE=1 SV=2	DYHC1_MOUSE	0	0	0	0	1	1
DNA polymerase beta OS=Mus musculus GN=Polb PE=2 SV=3	DPOLB_MOUSE	0	0	0	2	0	2
Death domain-associated protein 6 OS=Mus musculus GN=Daxx PE=1 SV=1	DAXX_MOUSE	0	0	0	4	0	3
Hepatoma-derived growth factor-related protein 3 OS=Mus musculus GN=Hdgfrp3 PE=1 SV=2	HDGR3_MOUSE	0	0	0	2	2	2
Lamina-associated polypeptide 2, isoforms alpha/zeta OS=Mus musculus GN=Tmpo PE=1 SV=4	LAP2A_MOUSE	0	0	0	1	1	0
Lysine-specific demethylase 2A OS=Mus musculus GN=Kdm2a PE=1 SV=2	KDM2A_MOUSE	0	0	0	1	0	1
Methyl-CpG-binding protein 2 OS=Mus musculus GN=Mecp2 PE=1 SV=1	MECP2_MOUSE	0	0	0	1	0	1
Tyrosine-protein kinase BAZ1B OS=Mus musculus GN=Baz1b PE=1 SV=2	BAZ1B_MOUSE	0	0	0	1	0	1

## Sheet: Normalized Spectral Counts
MS/MS View:547 Proteins in 488 ClustersWith 4 Decoys	Accession Number	HA/FLAG-H3.1 + DOX (1)	HA/FLAG-H3.3 + DOX (1)	HA/FLAG-H3.1 + DOX (2)	HA/FLAG-H3.3 + DOX (2)
Histone H4 OS=Mus musculus GN=Hist1h4a PE=1 SV=2	H4_MOUSE	378.974	378.972	378.978	379
Cluster of Histone H2B type 2-B OS=Mus musculus GN=Hist2h2bb PE=1 SV=3 (H2B2B_MOUSE)	H2B2B_MOUSE [3]	203.673	213.444	243.827	221
Histone H3.1 OS=Mus musculus GN=Hist1h3a PE=1 SV=2	H31_MOUSE	100.317	6.534	110.071	6
Cluster of Histone H2A type 1-F OS=Mus musculus GN=Hist1h2af PE=1 SV=3 (H2A1F_MOUSE)	H2A1F_MOUSE [8]	92.2103	95.832	172.769	124
Poly [ADP-ribose] polymerase 1 OS=Mus musculus GN=Parp1 PE=1 SV=3	PARP1_MOUSE	40.532	31.581	43.1923	27
Basement membrane-specific heparan sulfate proteoglycan core protein OS=Mus musculus GN=Hspg2 PE=1 SV=1	PGBM_MOUSE	32.4256	41.382	54.3387	43
Histone H3.2 OS=Mus musculus GN=Hist1h3b PE=1 SV=2	H32_MOUSE	29.3857	32.67	43.1923	32
Histone H2A.V OS=Mus musculus GN=H2afv PE=1 SV=3	H2AV_MOUSE (+1)	27.3591	31.581	43.1923	42
Histone H2A type 1-F OS=Mus musculus GN=Hist1h2af PE=1 SV=3	H2A1F_MOUSE (+5)	23.3059	27.225	37.6191	24
High mobility group protein HMG-I/HMG-Y OS=Mus musculus GN=Hmga1 PE=1 SV=4	HMGA1_MOUSE	22.2926	14.157	26.4727	21
Core histone macro-H2A.2 OS=Mus musculus GN=H2afy2 PE=1 SV=3	H2AW_MOUSE	22.2926	33.759	30.6526	35
Non-histone chromosomal protein HMG-14 OS=Mus musculus GN=Hmgn1 PE=1 SV=2	HMGN1_MOUSE	22.2926	27.225	13.933	23
High mobility group protein HMGI-C OS=Mus musculus GN=Hmga2 PE=1 SV=1	HMGA2_MOUSE	21.2793	20.691	32.0459	23
Core histone macro-H2A.1 OS=Mus musculus GN=H2afy PE=1 SV=3	H2AY_MOUSE	19.2527	19.602	20.8995	28
PC4 and SFRS1-interacting protein OS=Mus musculus GN=Psip1 PE=1 SV=1	PSIP1_MOUSE	18.2394	28.314	15.3263	23
Cluster of Histone H1.4 OS=Mus musculus GN=Hist1h1e PE=1 SV=2 (H14_MOUSE)	H14_MOUSE [3]	16.2128	17.424	16.7196	17
Histone H2A type 2-A OS=Mus musculus GN=Hist2h2aa1 PE=1 SV=3	H2A2A_MOUSE (+1)	15.1995	17.424	22.2928	16
Histone H3.3 OS=Mus musculus GN=H3f3a PE=1 SV=2	H33_MOUSE (+1)	14.1862	67.518	13.933	81
Interferon-activable protein 202 OS=Mus musculus GN=Ifi202 PE=1 SV=3	IFI2_MOUSE	14.1862	13.068	9.7531	10
Regulator of chromosome condensation OS=Mus musculus GN=Rcc1 PE=1 SV=1	RCC1_MOUSE	14.1862	23.958	19.5062	19
Histone H1.5 OS=Mus musculus GN=Hist1h1b PE=1 SV=2	H15_MOUSE	12.1596	11.979	2.7866	13
Non-histone chromosomal protein HMG-17 OS=Mus musculus GN=Hmgn2 PE=1 SV=2	HMGN2_MOUSE	12.1596	14.157	0	14
FACT complex subunit SPT16 OS=Mus musculus GN=Supt16h PE=1 SV=2	SP16H_MOUSE	11.1463	15.246	12.5397	20
DnaJ homolog subfamily C member 9 OS=Mus musculus GN=Dnajc9 PE=2 SV=2	DNJC9_MOUSE	10.133	7.623	11.1464	6
Transitional endoplasmic reticulum ATPase OS=Mus musculus GN=Vcp PE=1 SV=4	TERA_MOUSE	9.1197	9.801	6.9665	12
Cluster of Metastasis-associated protein MTA1 OS=Mus musculus GN=Mta1 PE=1 SV=1 (MTA1_MOUSE)	MTA1_MOUSE	8.1064	4.356	4.1799	4
Chromodomain-helicase-DNA-binding protein 4 OS=Mus musculus GN=Chd4 PE=1 SV=1	CHD4_MOUSE	7.0931	3.267	1.3933	4
Barrier-to-autointegration factor OS=Mus musculus GN=Banf1 PE=1 SV=1	BAF_MOUSE	7.0931	6.534	9.7531	6
Chromobox protein homolog 5 OS=Mus musculus GN=Cbx5 PE=1 SV=1	CBX5_MOUSE	7.0931	8.712	15.3263	9
Metastasis-associated protein MTA1 OS=Mus musculus GN=Mta1 PE=1 SV=1	MTA1_MOUSE	7.0931	3.267	2.7866	4
Histone H2AX OS=Mus musculus GN=H2afx PE=1 SV=2	H2AX_MOUSE	6.0798	9.801	15.3263	8
FACT complex subunit SSRP1 OS=Mus musculus GN=Ssrp1 PE=1 SV=2	SSRP1_MOUSE	6.0798	8.712	13.933	6
Heterochromatin protein 1-binding protein 3 OS=Mus musculus GN=Hp1bp3 PE=1 SV=1	HP1B3_MOUSE	6.0798	14.157	8.3598	12
Histone deacetylase 1 OS=Mus musculus GN=Hdac1 PE=1 SV=1	HDAC1_MOUSE	6.0798	3.267	2.7866	6
Histone-binding protein RBBP4 OS=Mus musculus GN=Rbbp4 PE=1 SV=5	RBBP4_MOUSE	6.0798	2.178	13.933	9
Histone H1.4 OS=Mus musculus GN=Hist1h1e PE=1 SV=2	H14_MOUSE	5.0665	6.534	2.7866	5
Activated RNA polymerase II transcriptional coactivator p15 OS=Mus musculus GN=Sub1 PE=1 SV=3	TCP4_MOUSE	5.0665	5.445	2.7866	6
DNA topoisomerase 1 OS=Mus musculus GN=Top1 PE=1 SV=2	TOP1_MOUSE	5.0665	4.356	2.7866	4
Transcriptional repressor p66-beta OS=Mus musculus GN=Gatad2b PE=1 SV=1	P66B_MOUSE	5.0665	2.178	2.7866	4
Glypican-4 OS=Mus musculus GN=Gpc4 PE=2 SV=2	GPC4_MOUSE	4.0532	4.356	2.7866	1
Histone H1.0 OS=Mus musculus GN=H1f0 PE=2 SV=4	H10_MOUSE	4.0532	7.623	2.7866	5
Metastasis-associated protein MTA2 OS=Mus musculus GN=Mta2 PE=1 SV=1	MTA2_MOUSE	4.0532	4.356	2.7866	3
60S ribosomal protein L30 OS=Mus musculus GN=Rpl30 PE=2 SV=2	RL30_MOUSE	3.0399	2.178	1.3933	0
Chromobox protein homolog 3 OS=Mus musculus GN=Cbx3 PE=1 SV=2	CBX3_MOUSE	3.0399	2.178	4.1799	3
GTP-binding nuclear protein Ran OS=Mus musculus GN=Ran PE=1 SV=3	RAN_MOUSE	3.0399	6.534	5.5732	6
High mobility group nucleosome-binding domain-containing protein 3 OS=Mus musculus GN=Hmgn3 PE=2 SV=1	HMGN3_MOUSE	3.0399	6.534	0	3
Nucleolin OS=Mus musculus GN=Ncl PE=1 SV=2	NUCL_MOUSE	3.0399	0	6.9665	1
Transcriptional regulator ATRX OS=Mus musculus GN=Atrx PE=1 SV=3	ATRX_MOUSE	3.0399	7.623	1.3933	9
E3 ubiquitin-protein ligase RING2 OS=Mus musculus GN=Rnf2 PE=1 SV=1	RING2_MOUSE	2.0266	3.267	2.7866	3
Hepatoma-derived growth factor-related protein 2 OS=Mus musculus GN=Hdgfrp2 PE=1 SV=1	HDGR2_MOUSE	2.0266	3.267	0	2
Histone-lysine N-methyltransferase EZH2 OS=Mus musculus GN=Ezh2 PE=1 SV=2	EZH2_MOUSE	2.0266	4.356	4.1799	4
Nuclear ubiquitous casein and cyclin-dependent kinase substrate 1 OS=Mus musculus GN=Nucks1 PE=1 SV=1	NUCKS_MOUSE	2.0266	3.267	2.7866	1
PHD finger protein 14 OS=Mus musculus GN=Phf14 PE=1 SV=1	PHF14_MOUSE	2.0266	1.089	4.1799	2
Protein DEK OS=Mus musculus GN=Dek PE=1 SV=1	DEK_MOUSE	2.0266	3.267	2.7866	3
Zinc finger CCCH domain-containing protein 11A OS=Mus musculus GN=Zc3h11a PE=2 SV=1	ZC11A_MOUSE	2.0266	0	2.7866	0
Zinc finger protein 512 OS=Mus musculus GN=Znf512 PE=2 SV=2	ZN512_MOUSE	2.0266	2.178	0	9
CTD small phosphatase-like protein 2 OS=Mus musculus GN=Ctdspl2 PE=2 SV=1	CTSL2_MOUSE	1.0133	0	1.3933	1
Chromatin modification-related protein MEAF6 OS=Mus musculus GN=Meaf6 PE=2 SV=1	EAF6_MOUSE (+1)	1.0133	0	0	1
Chromobox protein homolog 1 OS=Mus musculus GN=Cbx1 PE=1 SV=1	CBX1_MOUSE	1.0133	3.267	6.9665	2
DNA damage-binding protein 1 OS=Mus musculus GN=Ddb1 PE=1 SV=2	DDB1_MOUSE	1.0133	3.267	2.7866	1
DNA ligase 3 OS=Mus musculus GN=Lig3 PE=1 SV=2	DNLI3_MOUSE	1.0133	0	0	1
DNA repair protein XRCC1 OS=Mus musculus GN=Xrcc1 PE=1 SV=2	XRCC1_MOUSE	1.0133	1.089	0	1
DNA topoisomerase 2-beta OS=Mus musculus GN=Top2b PE=1 SV=2	TOP2B_MOUSE	1.0133	2.178	4.1799	2
Exportin-2 OS=Mus musculus GN=Cse1l PE=2 SV=1	XPO2_MOUSE	1.0133	2.178	1.3933	3
F-box only protein 28 OS=Mus musculus GN=Fbxo28 PE=2 SV=1	FBX28_MOUSE	1.0133	1.089	0	3
Glypican-1 OS=Mus musculus GN=Gpc1 PE=1 SV=1	GPC1_MOUSE	1.0133	0	1.3933	0
High mobility group protein 20A OS=Mus musculus GN=Hmg20a PE=2 SV=1	HM20A_MOUSE	1.0133	1.089	1.3933	3
Histone acetyltransferase KAT7 OS=Mus musculus GN=Kat7 PE=2 SV=1	KAT7_MOUSE	1.0133	1.089	0	1
Pleiotrophin OS=Mus musculus GN=Ptn PE=2 SV=1	PTN_MOUSE	1.0133	4.356	2.7866	4
Probable ATP-dependent RNA helicase DDX5 OS=Mus musculus GN=Ddx5 PE=1 SV=2	DDX5_MOUSE	1.0133	0	1.3933	0
S-phase kinase-associated protein 1 OS=Mus musculus GN=Skp1 PE=1 SV=3	SKP1_MOUSE	1.0133	1.089	2.7866	1
Structural maintenance of chromosomes protein 3 OS=Mus musculus GN=Smc3 PE=1 SV=2	SMC3_MOUSE	1.0133	1.089	2.7866	1
Targeting protein for Xklp2 OS=Mus musculus GN=Tpx2 PE=1 SV=1	TPX2_MOUSE	1.0133	0	1.3933	0
Transcription elongation factor, mitochondrial OS=Mus musculus GN=Tefm PE=2 SV=1	TEFM_MOUSE	1.0133	0	1.3933	1
Transcription factor 20 OS=Mus musculus GN=Tcf20 PE=1 SV=3	TCF20_MOUSE	1.0133	0	1.3933	1
Triple functional domain protein OS=Mus musculus GN=Trio PE=1 SV=3	TRIO_MOUSE	1.0133	0	0	1
YY1-associated factor 2 OS=Mus musculus GN=Yaf2 PE=1 SV=1	YAF2_MOUSE (+1)	1.0133	0	0	1
Histone deacetylase 2 OS=Mus musculus GN=Hdac2 PE=1 SV=1	HDAC2_MOUSE	0	1.089	1.3933	4
Protein ELYS OS=Mus musculus GN=Ahctf1 PE=1 SV=1	ELYS_MOUSE	0	2.178	8.3598	0
SWI/SNF-related matrix-associated actin-dependent regulator of chromatin subfamily A member 5 OS=Mus musculus GN=Smarca5 PE=1 SV=1	SMCA5_MOUSE	0	2.178	4.1799	0
Chromobox protein homolog 8 OS=Mus musculus GN=Cbx8 PE=1 SV=1	CBX8_MOUSE	0	2.178	2.7866	1
Cysteine and glycine-rich protein 2 OS=Mus musculus GN=Csrp2 PE=1 SV=3	CSRP2_MOUSE	0	1.089	1.3933	1
Cytoplasmic dynein 1 heavy chain 1 OS=Mus musculus GN=Dync1h1 PE=1 SV=2	DYHC1_MOUSE	0	0	1.3933	1
DNA polymerase beta OS=Mus musculus GN=Polb PE=2 SV=3	DPOLB_MOUSE	0	2.178	0	2
Death domain-associated protein 6 OS=Mus musculus GN=Daxx PE=1 SV=1	DAXX_MOUSE	0	4.356	0	3
Hepatoma-derived growth factor-related protein 3 OS=Mus musculus GN=Hdgfrp3 PE=1 SV=2	HDGR3_MOUSE	0	2.178	2.7866	2
Lamina-associated polypeptide 2, isoforms alpha/zeta OS=Mus musculus GN=Tmpo PE=1 SV=4	LAP2A_MOUSE	0	1.089	1.3933	0
Lysine-specific demethylase 2A OS=Mus musculus GN=Kdm2a PE=1 SV=2	KDM2A_MOUSE	0	1.089	0	1
Methyl-CpG-binding protein 2 OS=Mus musculus GN=Mecp2 PE=1 SV=1	MECP2_MOUSE	0	1.089	0	1
Tyrosine-protein kinase BAZ1B OS=Mus musculus GN=Baz1b PE=1 SV=2	BAZ1B_MOUSE	0	1.089	0	1

## Sheet: H3.1 vs H3.3
H33_MOUSE (+1)	H3.3
HMGN3_MOUSE	H3.3
ATRX_MOUSE	H3.3
XPO2_MOUSE	H3.3
HDAC2_MOUSE	shared
DPOLB_MOUSE	H3.3
DAXX_MOUSE	H3.3
KDM2A_MOUSE	shared
MECP2_MOUSE	shared
BAZ1B_MOUSE	shared
H4_MOUSE	shared
H2B2B_MOUSE [3]	shared
H31_MOUSE	H3.1
H2A1F_MOUSE [8]	shared
PARP1_MOUSE	shared
PGBM_MOUSE	shared
H32_MOUSE	shared
H2AV_MOUSE (+1)	shared
H2A1F_MOUSE (+5)	shared
HMGA1_MOUSE	shared
H2AW_MOUSE	shared
HMGN1_MOUSE	shared
HMGA2_MOUSE	shared
H2AY_MOUSE	shared
PSIP1_MOUSE	shared
H14_MOUSE [3]	shared
H2A2A_MOUSE (+1)	shared
IFI2_MOUSE	shared
RCC1_MOUSE	shared
H15_MOUSE	shared
HMGN2_MOUSE	shared
SP16H_MOUSE	shared
DNJC9_MOUSE	shared
TERA_MOUSE	shared
MTA1_MOUSE	shared
CHD4_MOUSE	shared
BAF_MOUSE	shared
CBX5_MOUSE	shared
MTA1_MOUSE	shared
H2AX_MOUSE	shared
SSRP1_MOUSE	shared
HP1B3_MOUSE	shared
HDAC1_MOUSE	shared
RBBP4_MOUSE	shared
H14_MOUSE	shared
TCP4_MOUSE	shared
TOP1_MOUSE	shared
P66B_MOUSE	shared
GPC4_MOUSE	shared
H10_MOUSE	shared
MTA2_MOUSE	shared
CBX3_MOUSE	shared
RAN_MOUSE	shared
RING2_MOUSE	shared
HDGR2_MOUSE	shared
EZH2_MOUSE	shared
NUCKS_MOUSE	shared
PHF14_MOUSE	shared
DEK_MOUSE	shared
ZN512_MOUSE	shared
CBX1_MOUSE	shared
DDB1_MOUSE	shared
XRCC1_MOUSE	shared
TOP2B_MOUSE	shared
FBX28_MOUSE	shared
HM20A_MOUSE	shared
KAT7_MOUSE	shared
PTN_MOUSE	shared
SKP1_MOUSE	shared
SMC3_MOUSE	shared
CBX8_MOUSE	shared
CSRP2_MOUSE	shared
HDGR3_MOUSE	shared
RL30_MOUSE	shared
NUCL_MOUSE	H3.1
ZC11A_MOUSE	H3.1
CTSL2_MOUSE	shared
EAF6_MOUSE (+1)	shared
DNLI3_MOUSE	shared
GPC1_MOUSE	shared
DDX5_MOUSE	shared
TPX2_MOUSE	shared
TEFM_MOUSE	shared
TCF20_MOUSE	shared
TRIO_MOUSE	shared
YAF2_MOUSE (+1)	shared
ELYS_MOUSE	shared
SMCA5_MOUSE	shared
DYHC1_MOUSE	shared
LAP2A_MOUSE	shared
